# Supplementary material for: Testosterone pulses paired with a location induce a place preference to the nest of a monogamous mouse under field conditions
Source: eLife journal article supplement (doi:10.7554/elife.65820), 2022-03-30
Supplement: supp [file elife_poa_e65820_Figure_2_figure_supplement_1.pdf › elife_poa_e65820_Figure_2_figure_supplement_1.pdf]

# Proportion of Time Male Spent at the Nest

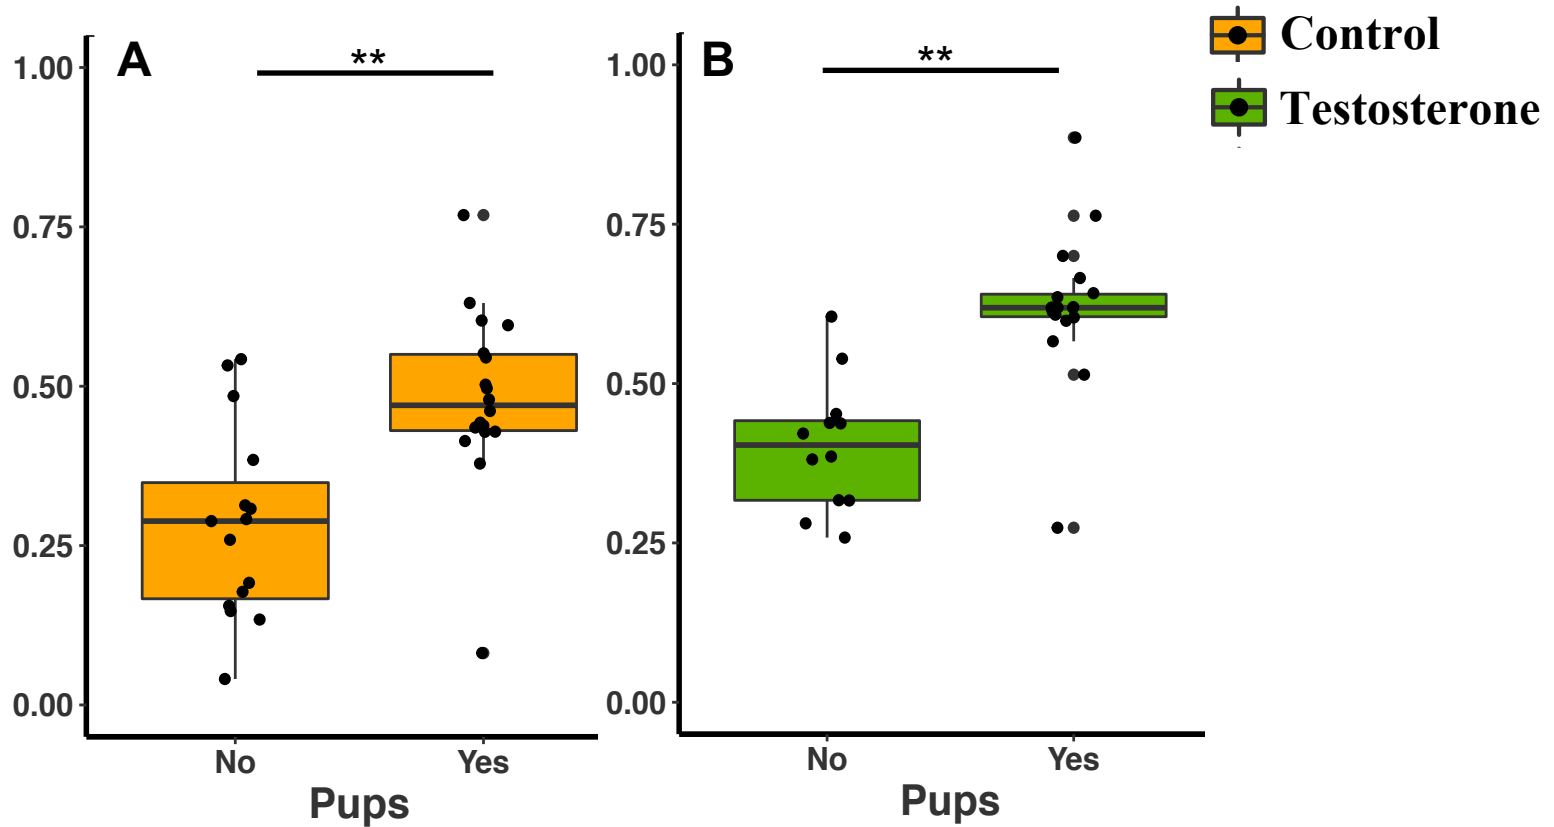

**Figure 2 – figure supplement 1.** Median and quantiles of male time at the nest by treatment type and by presence of pups. **A)** C-male time at the nest with (n=6) and without (n=5). **B)** T-male time at the nest with (n=6) and without (n=4) pups. T-males with pups spent 15% more time at the nest than C-male with pups, and T-males without pups spent 12% more time at the nest than C-males without pups (treatment GLMM Estimate  $0.13 \pm 0.03$ ,  $p < 0.01$ ; pups GLMM Estimate  $0.21 \pm 0.03$ ,  $p < 0.01$ ). A single dot represents the observations from one individual on a single night. For each individual there are therefore three dots in the figure representing three nights (reflecting our repeated measures GLMM analysis). There is no loss of statistical significance if data are analyzed with individual averages instead of repeated measures (See Appendix 1). Source data 1.
