# Supplementary figures and images for: Testosterone pulses paired with a location induce a place preference to the nest of a monogamous mouse under field conditions
Source: eLife journal article supplement (doi:10.7554/elife.65820), 2022-03-30

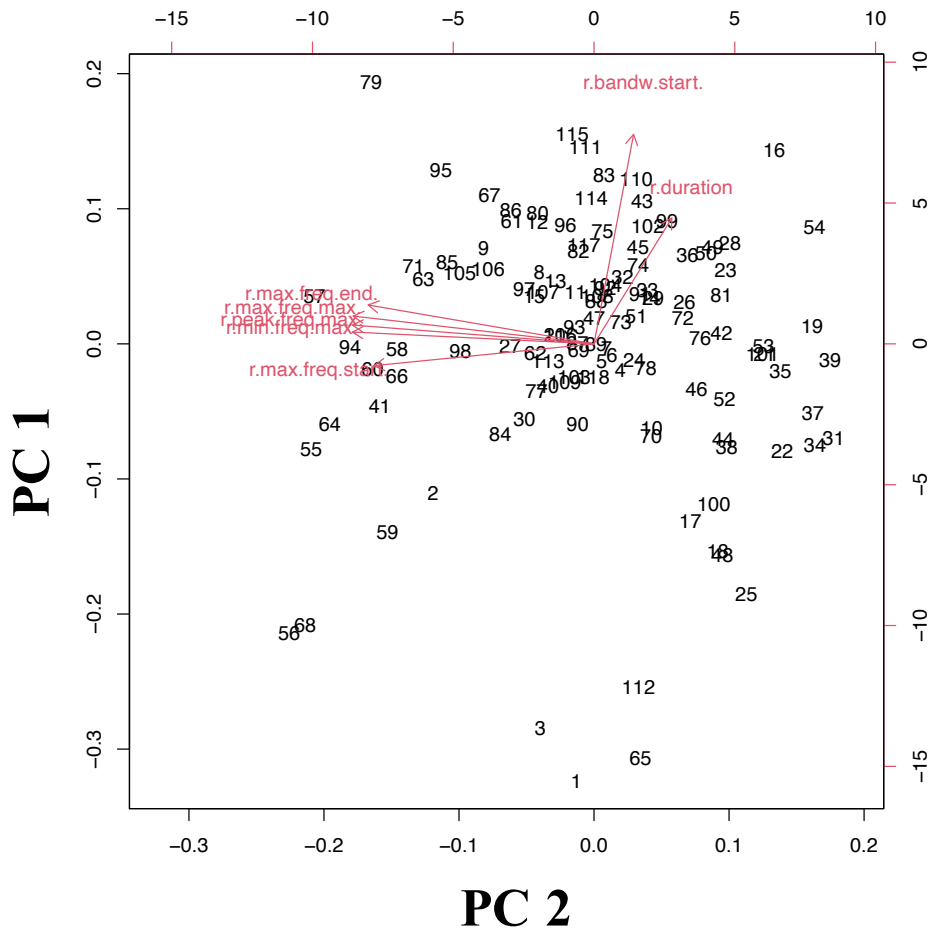

Supplement: supp [file elife_poa_e65820_Figure_5_figure_supplement_1.pdf › elife_poa_e65820_Figure_5_figure_supplement_1.pdf]

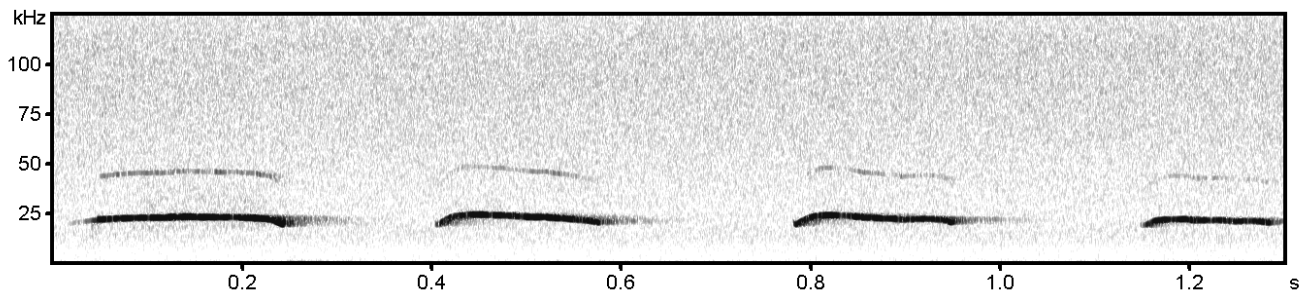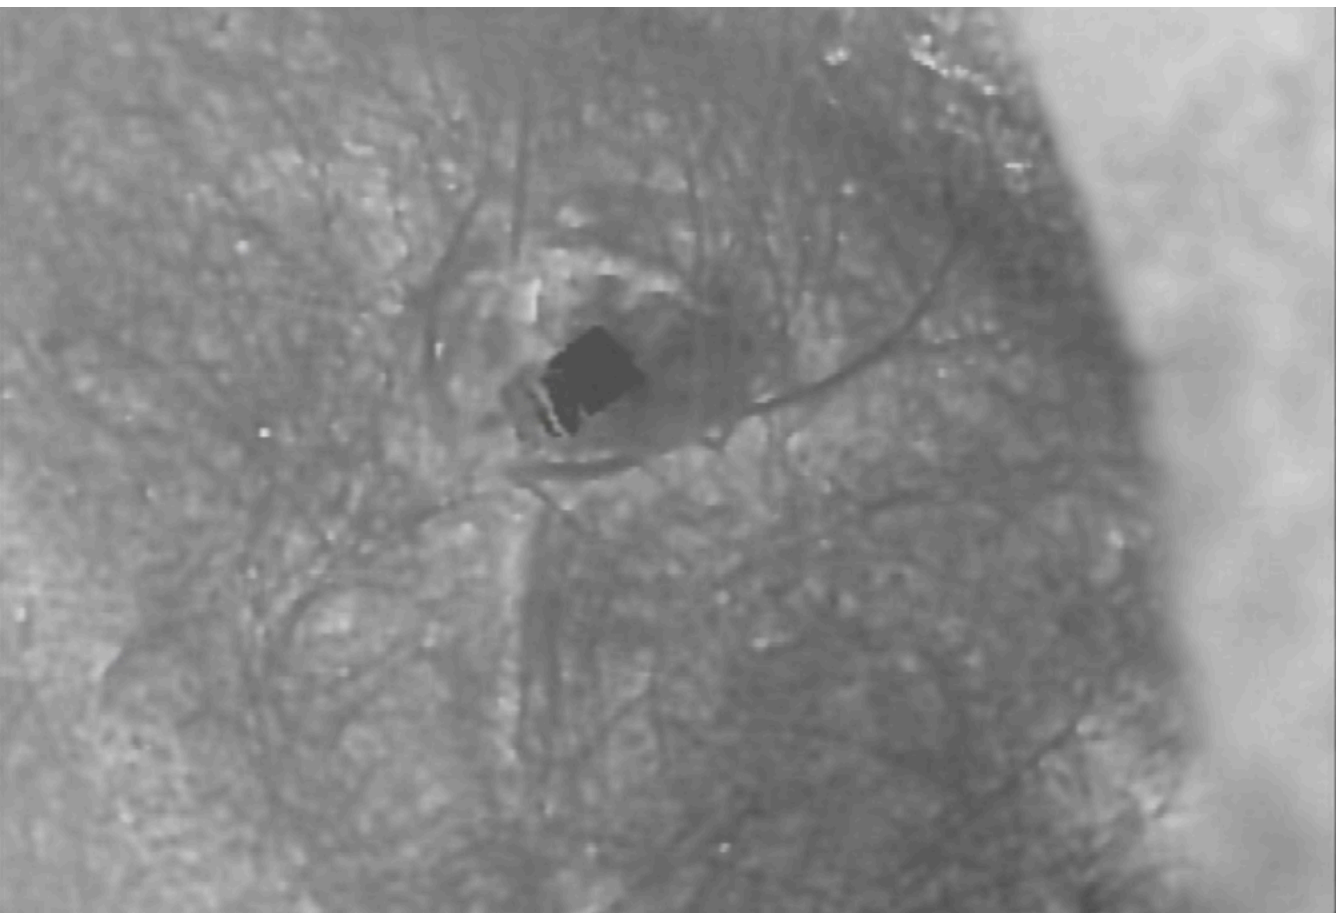

Supplement: video1-data1 [file elife-65820-video1-data1-v2.zip]
